# Supplementary material for: Nonlinear optical response and biological applications of a series of pyrimidine-based molecules for copper(ii) ion probe
Source: Royal Society of Chemistry journal article supplement (doi:10.1039/c3dt50582k), 2013-01-01
Supplement: c3dt50582k.pdf [file c3dt50582k.pdf]

## Supporting information

# Nonlinear optical response and biological applications of a series pyrimidine-based molecule for copper (II) ion probe

Qiong Zhang,<sup>a</sup> Lin Li,<sup>a</sup> Man Zhang,<sup>a</sup> Zhaodi Liu,<sup>a</sup> Jieying Wu,<sup>\*a</sup> Hongping Zhou,<sup>a</sup> and  
Jiaxiang Yang,<sup>a</sup> Shengyi Zhang,<sup>a</sup> Yupeng Tian,<sup>\*ab</sup>

<sup>a</sup> Department of Chemistry, Key Laboratory of Functional Inorganic Materials Chemistry of Anhui Province, Anhui University, Hefei, 230039, P. R. China E-mail: [jywu1957@163.com](mailto:jywu1957@163.com), [yptian@ahu.edu.cn](mailto:yptian@ahu.edu.cn)

<sup>b</sup> State Key Laboratory of Coordination Chemistry, Nanjing University, Nanjing 210093, P. R. China

**Figure S1** Time-dependent one-photon excited fluorescence emission spectra of TPP for various observation wavelengths .....2

**Figure S2.** Log–Log linear of squared dependence of induced fluorescence signal and incident irradiance intensity of two ligands and complexes **TPP** and **TPP +Cu<sup>2+</sup>** .....2

**Figure S3.** Cytotoxicity data results obtained from the MTT assay.....2

**Table S1** The oscillator strength  $\delta$  (a. u.), excitation energy **E** (eV) and wavelength  $\lambda$  (nm) of the eight lowest excited states of TPP (left) and **TPP** combine with Cu<sup>2+</sup> (right) in gas phase.....3

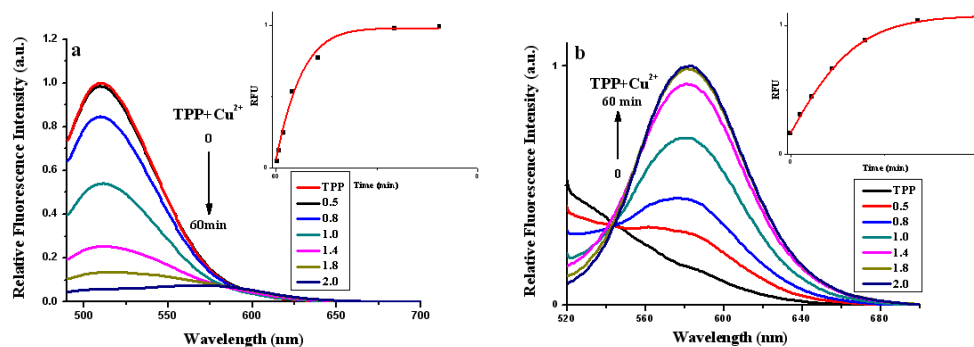

**Figure S1** Time-dependent one-photon excited fluorescence emission spectra of TPP for various observation wavelengths (a)  $\lambda_{ex}=400$  nm (b)  $\lambda_{ex}=504$  nm, respectively, over the course of 60 min.

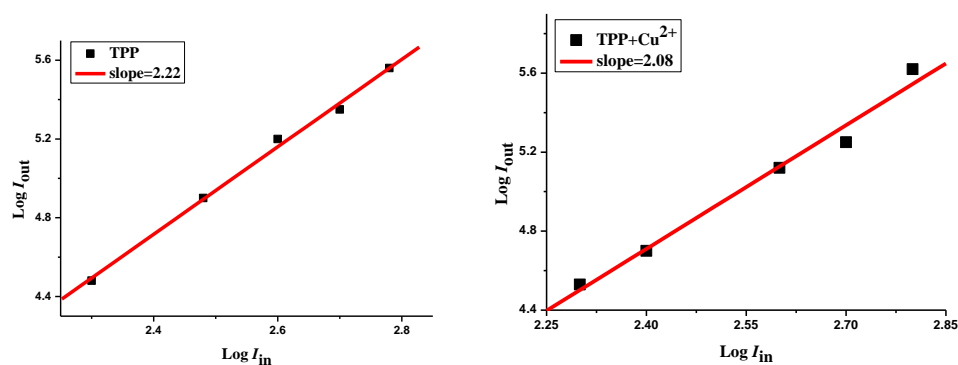

**Figure S2.** Log-Log linear of squared dependence of induced fluorescence signal and incident irradiance intensity of two ligands and complexes TPP and TPP+Cu<sup>2+</sup>.

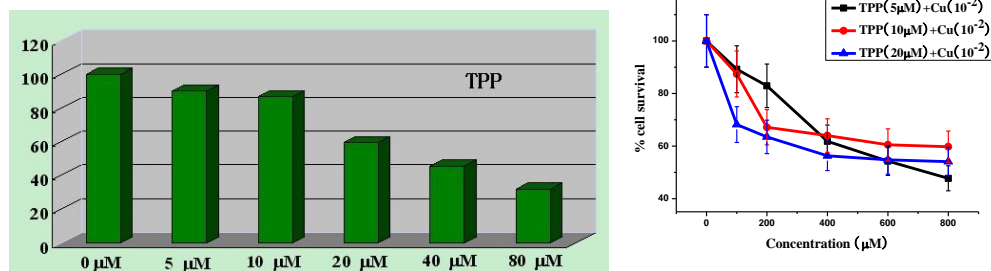

**Figure S3.** Cytotoxicity data results obtained from the MTT assay.

| TPP    |           |          | TPP combine with Cu <sup>2+</sup> |           |          |
|--------|-----------|----------|-----------------------------------|-----------|----------|
| E      | $\lambda$ | $\delta$ | E                                 | $\lambda$ | $\delta$ |
| 3.1962 | 387.32    | 1.0686   | 1.7363                            | 709.98    | 0.0165   |
| 3.6539 | 339.32    | 0.0041   | 1.9420                            | 638.45    | 0.1500   |
| 3.7389 | 331.61    | 0.0028   | 2.1964                            | 564.48    | 0.0019   |
| 4.2353 | 292.74    | 0.0501   | 2.5733                            | 481.81    | 0.0005   |
| 4.3082 | 287.79    | 0.0168   | 2.6469                            | 468.41    | 0.0000   |
| 4.6891 | 264.41    | 0.2941   | 2.9112                            | 425.89    | 0.0519   |
| 4.7542 | 260.79    | 0.0005   | 2.9242                            | 423.99    | 0.6396   |
| 4.8084 | 257.85    | 0.0395   | 3.0508                            | 406.39    | 0.0008   |

**Table S1** The oscillator strength  $\delta$  (a. u.), excitation energy **E** (eV) and wavelength  $\lambda$  (nm) of the eight lowest excited states of TPP (left) and **TPP** combine with Cu<sup>2+</sup> (right) in gas phase
